# Supplementary material
Source: HighWire-hosted journal article supplement (https://www.cmajopen.ca/highwire/filestream/80873/field_highwire_adjunct_files/0/open-2014-0099-1-at.pdf)
Supplement: open-2014-0099-1-at.pdf [file open-2014-0099-1-at.pdf]

**Appendix 1: Remuneration options and adjusted odds ratios for obtaining follow-up care after discharge from the emergency department**

Diagram of organization and remuneration options for primary care in Ontario

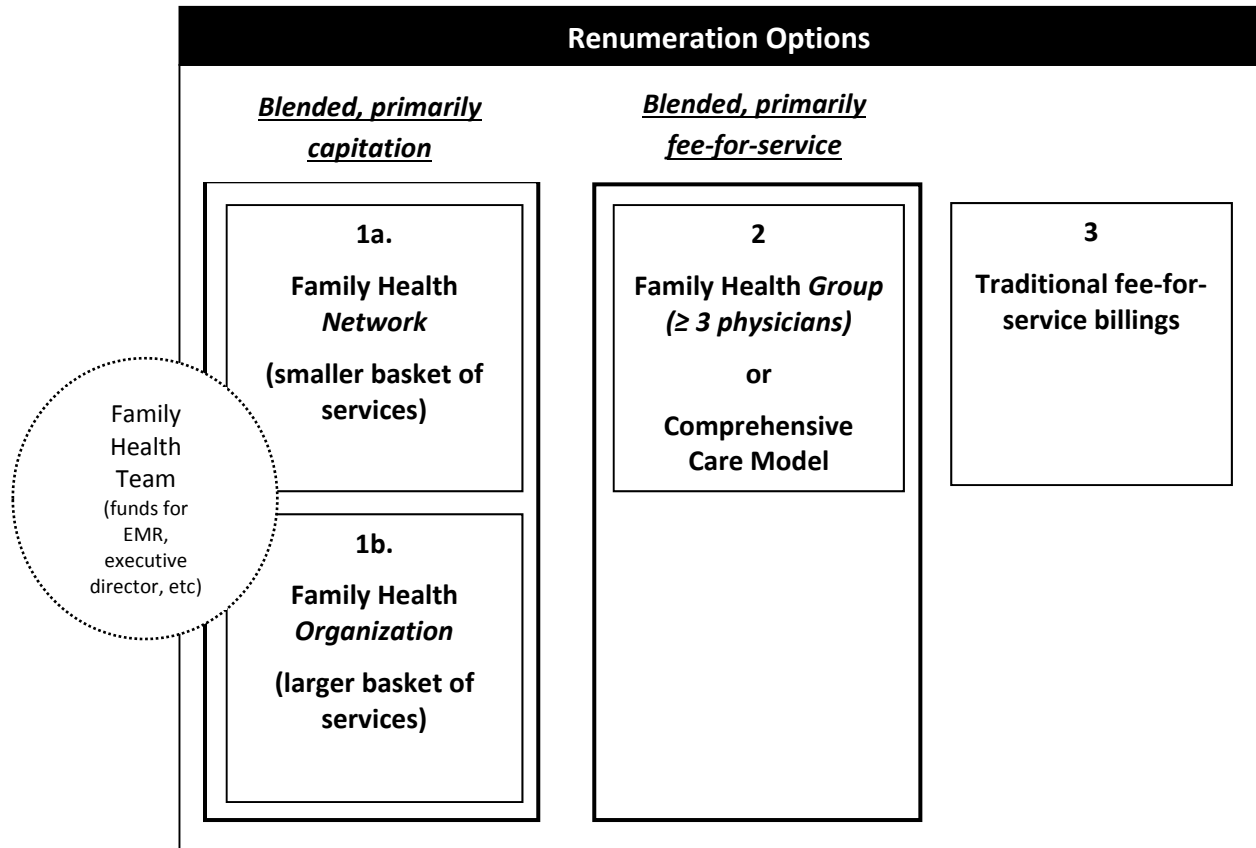

EMR: electronic medical records

Adjusted odds of obtaining follow-up care by a family physician, cardiologist, or internist, within seven days of emergency department discharge, among patients who had a family physician

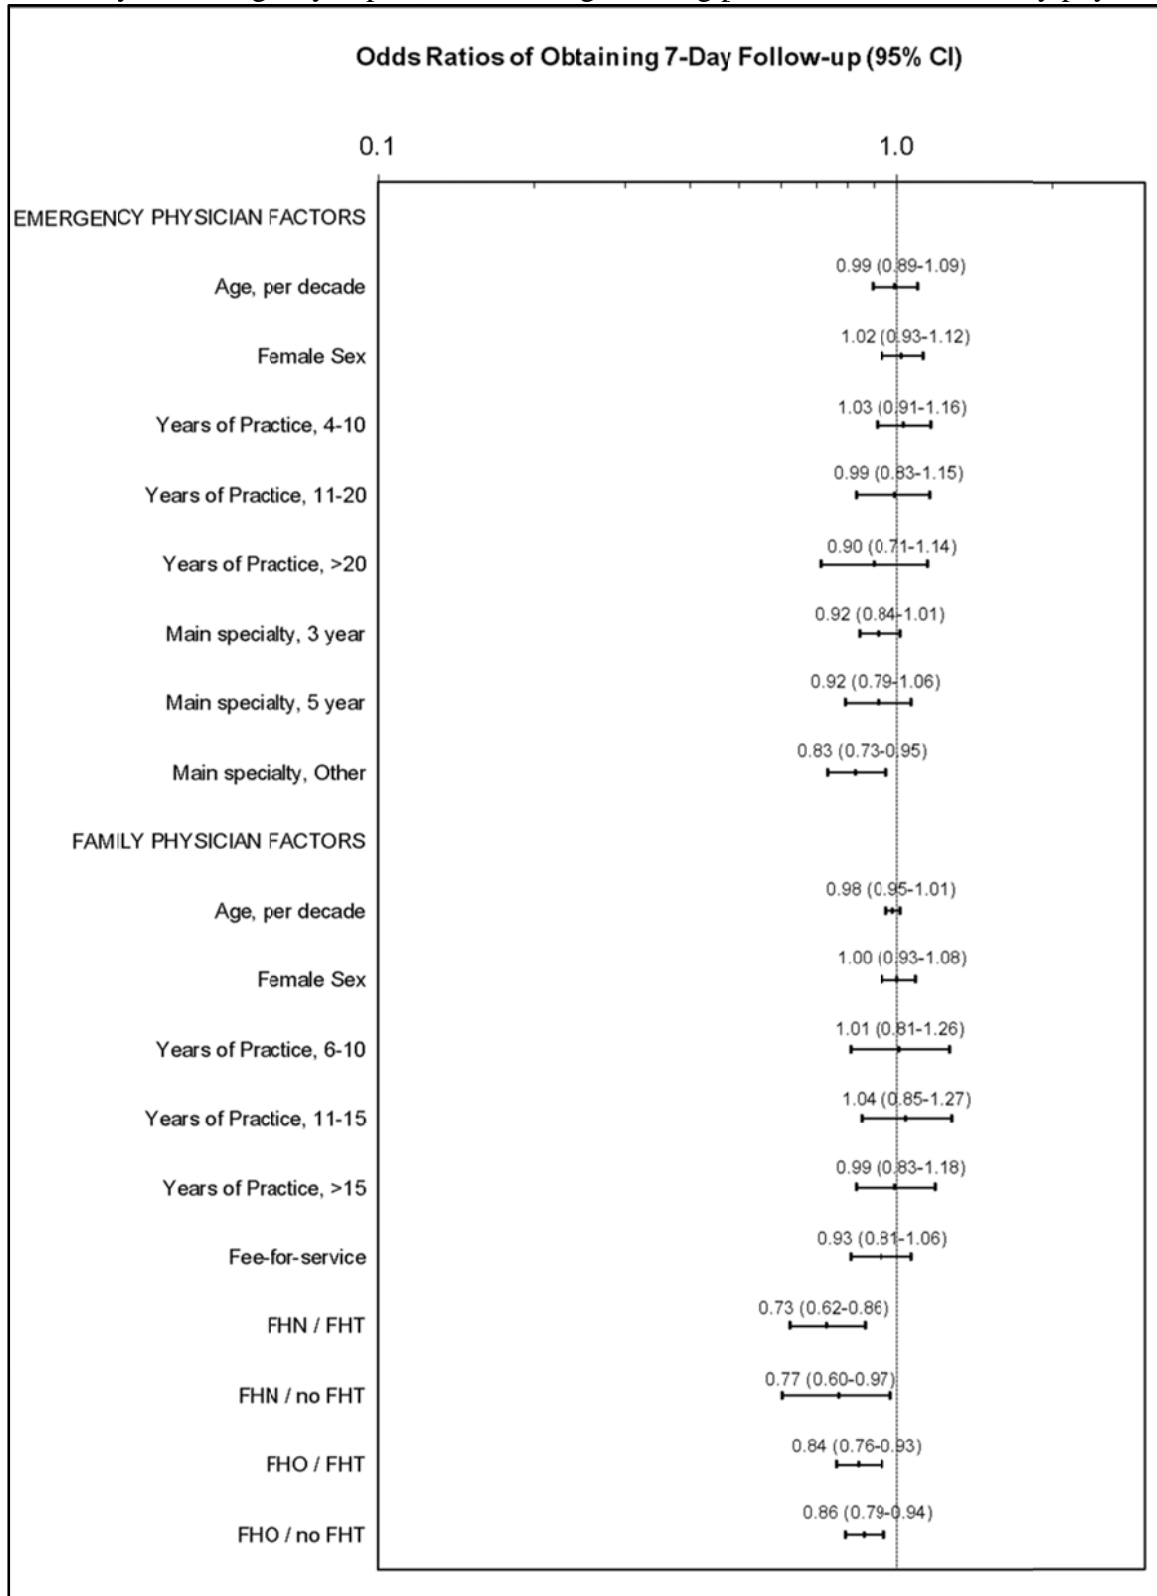

Adjusted odds of obtaining follow-up care by a family physician, cardiologist, or internist, within three days of emergency department discharge, among patients who had a family physician

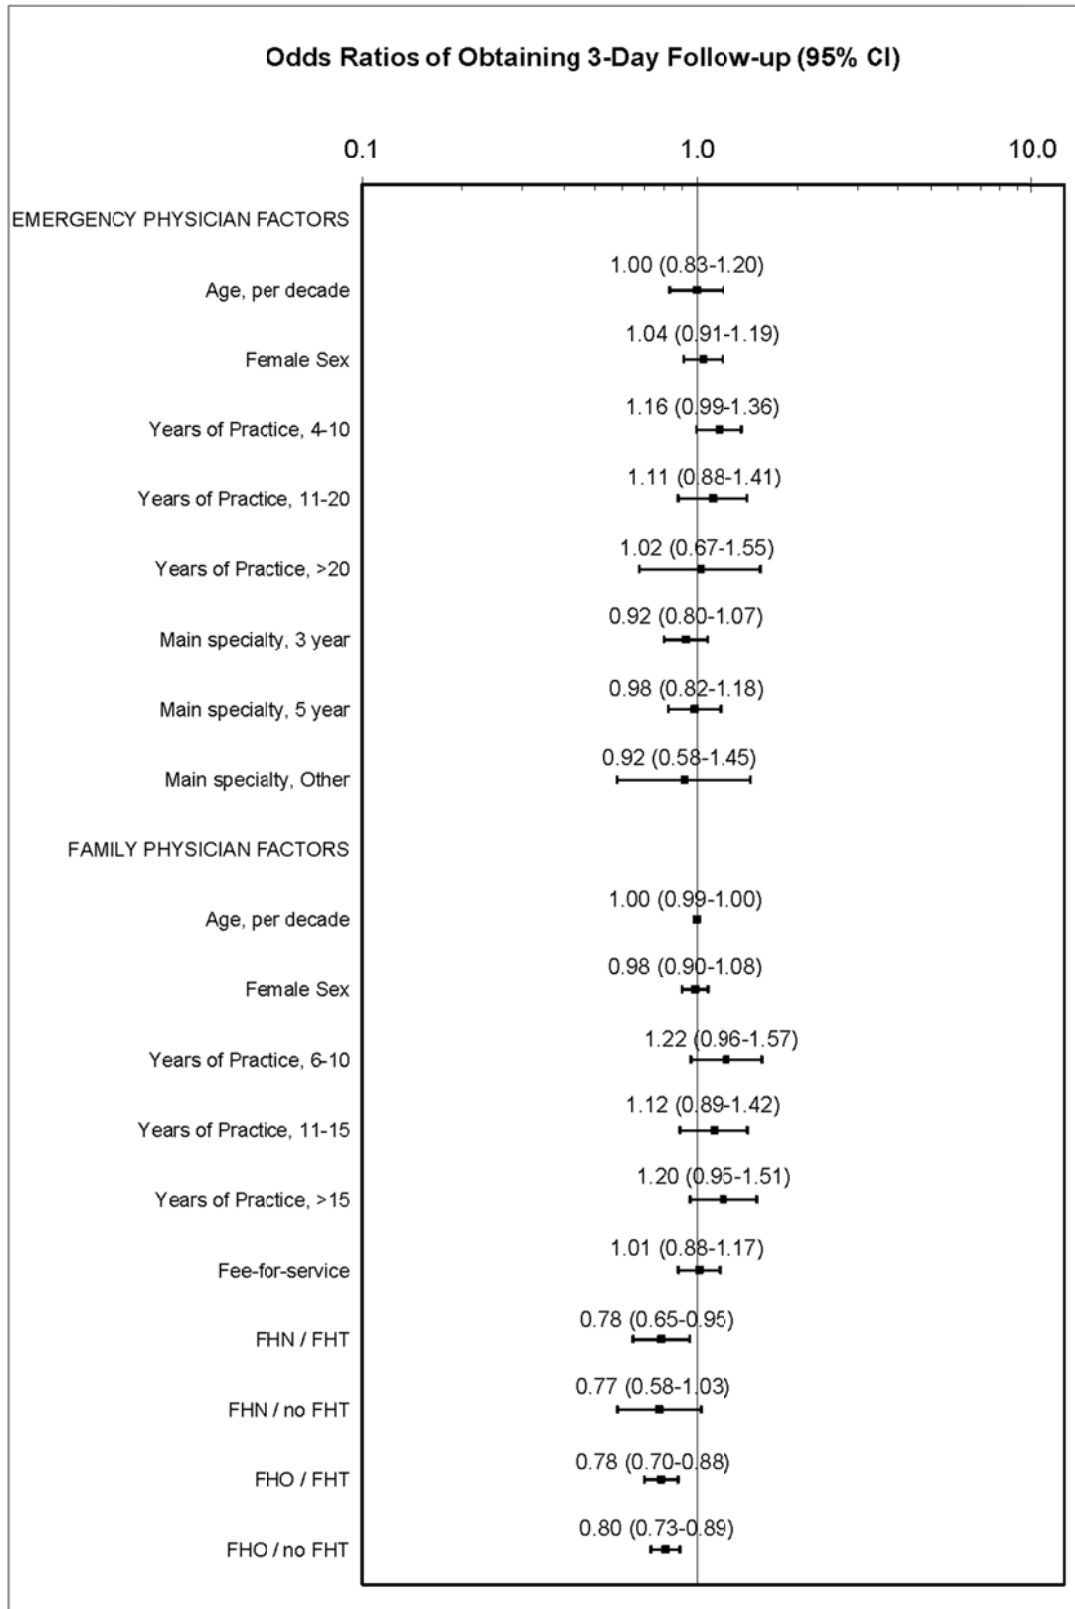

Adjusted odds of obtaining follow-up care by a family physician, cardiologist, or internist, within 30 days of emergency department discharge, among patients who had a family physician

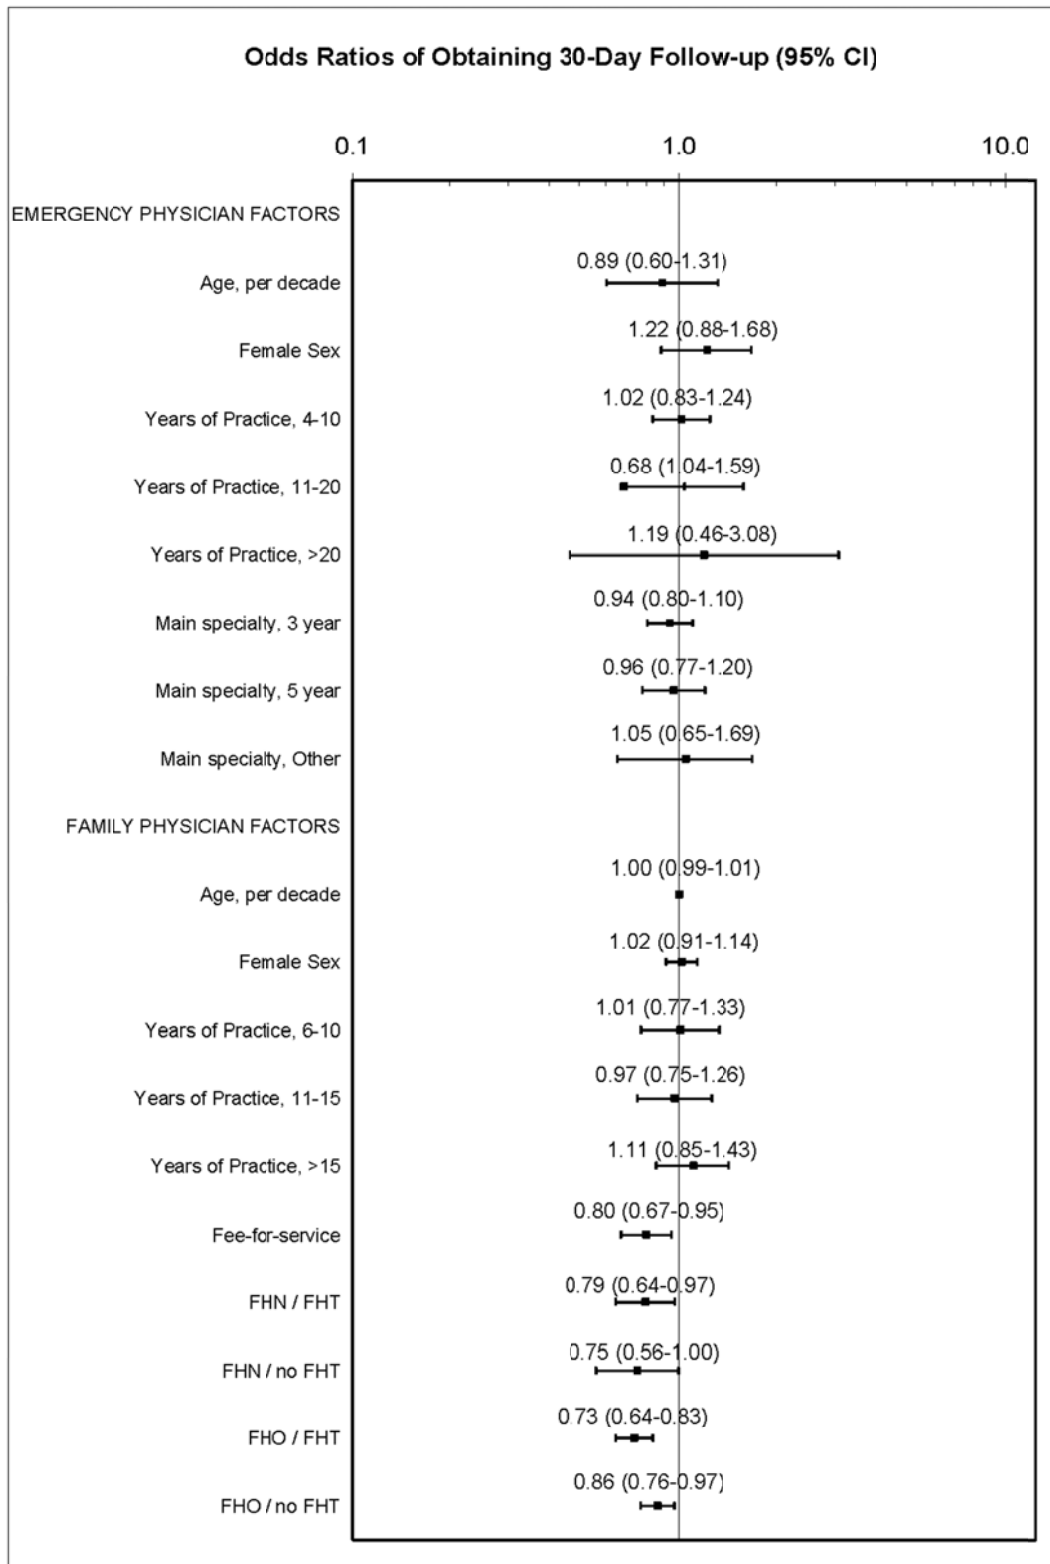

CCM (Comprehensive Care Model) or FHG (Family Health Group): mostly fee-for-service models (less than 3 physicians or 3+ physicians, respectively)

FHN (Family Health Network) and FHO (Family Health Organization): mostly capitation based reimbursement  
FHT (Family Health Team): not a reimbursement model, includes an interdisciplinary team
